# Supplementary material for: Re-refinement of 4xan: hen egg-white lysozyme with carboplatin in sodium bromide solution
Source: PubMed Central journal article supplement (PMC4774886; doi:10.1107/s2053230x16000777), 2016-02-19
Supplement: f-72-00251-sup1.pdf [file f-72-00251-sup1.pdf]

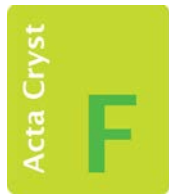

STRUCTURAL BIOLOGY  
COMMUNICATIONS

**Volume 72 (2016)**

**Supporting information for article:**

**Re-refinement of 4xan: hen egg white lysozyme with carboplatin in sodium bromide solution**

**Simon W. M. Tanley, Antoine M. M. Schreurs, Loes M. J. Kroon-Batenburg and John R Helliwell**

**Table S1** Crystal parameters, data processing and final model refinement statistics.

Statistics for the highest-resolution shell are shown in parentheses. The model refinement and validation software used was PHENIX\_REFINE (Afonine et al 2012).

|                                               |                                   |
|-----------------------------------------------|-----------------------------------|
| Wavelength (Å)                                | 0.9163                            |
| Resolution range (Å)                          | 39.29 - 1.30 (1.346 - 1.30)       |
| Space group                                   | P 4 <sub>3</sub> 2 <sub>1</sub> 2 |
| Unit cell                                     | 78.58, 37.29                      |
| Total reflections                             | 250129 (2024)                     |
| Unique reflections                            | 23088 (889)                       |
| Multiplicity                                  | 10.8 (2.3)                        |
| Completeness (%)                              | 78.76 (31.05)                     |
| Mean I/sigma(I)                               | 10.86 (0.39)                      |
| Wilson B-factor (Å <sup>2</sup> )             | 14.84                             |
| R-meas                                        | 0.095 (2.058)                     |
| CC <sub>1/2</sub>                             | 0.998 (0.181)                     |
| CC*                                           | 1.000 (0.553)                     |
| Reflections used for R-free                   | 1170 (5.34%)                      |
| R-work                                        | 0.1642 (0.2946)                   |
| R-free                                        | 0.2150 (0.248)                    |
| Cruickshank 'Diffraction Precision Index' (Å) | 0.061                             |
| Number of non-hydrogen atoms                  | 1150                              |
| macromolecules                                | 1039                              |
| ligands                                       | 29                                |
| water                                         | 82                                |
| Protein residues                              | 129                               |
| RMS(bonds)                                    | 0.009                             |
| RMS(angles)                                   | 1.18                              |
| Ramachandran favored (%)                      | 98                                |
| Ramachandran allowed (%)                      | 2                                 |
| Ramachandran outliers (%)                     | 0                                 |
| Average atomic B factor (Å <sup>2</sup> )     | 18.3                              |
| B-factor Protein atoms (Å <sup>2</sup> )      | 17.3                              |
| B-factor Ligand atoms (Å <sup>2</sup> )       | 31.7                              |
| B-factor Solvent atoms (Å <sup>2</sup> )      | 26.0                              |
